# Supplementary material for: A comparative study between Chinese propolis and Brazilian green propolis: metabolite profile and bioactivity
Source: Royal Society of Chemistry journal article supplement (doi:10.1039/c9fo02051a), 2020-01-01
Supplement: c9fo02051a1.pdf [file c9fo02051a1.pdf]

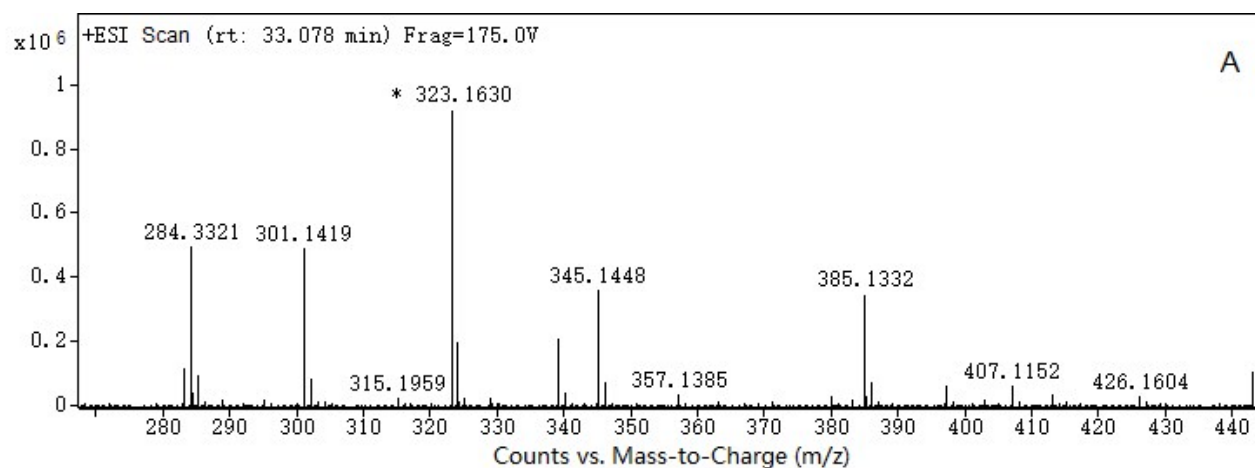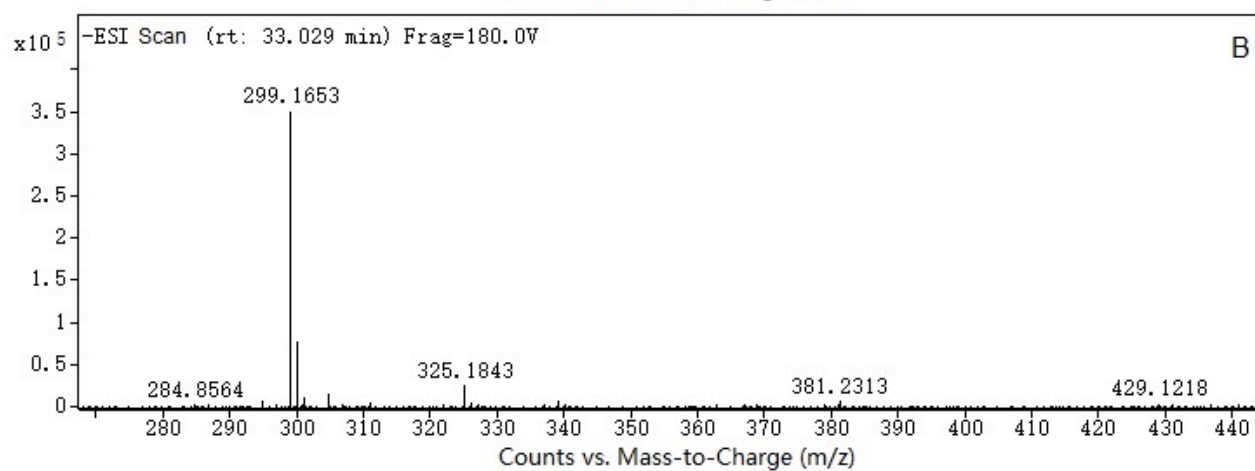

C

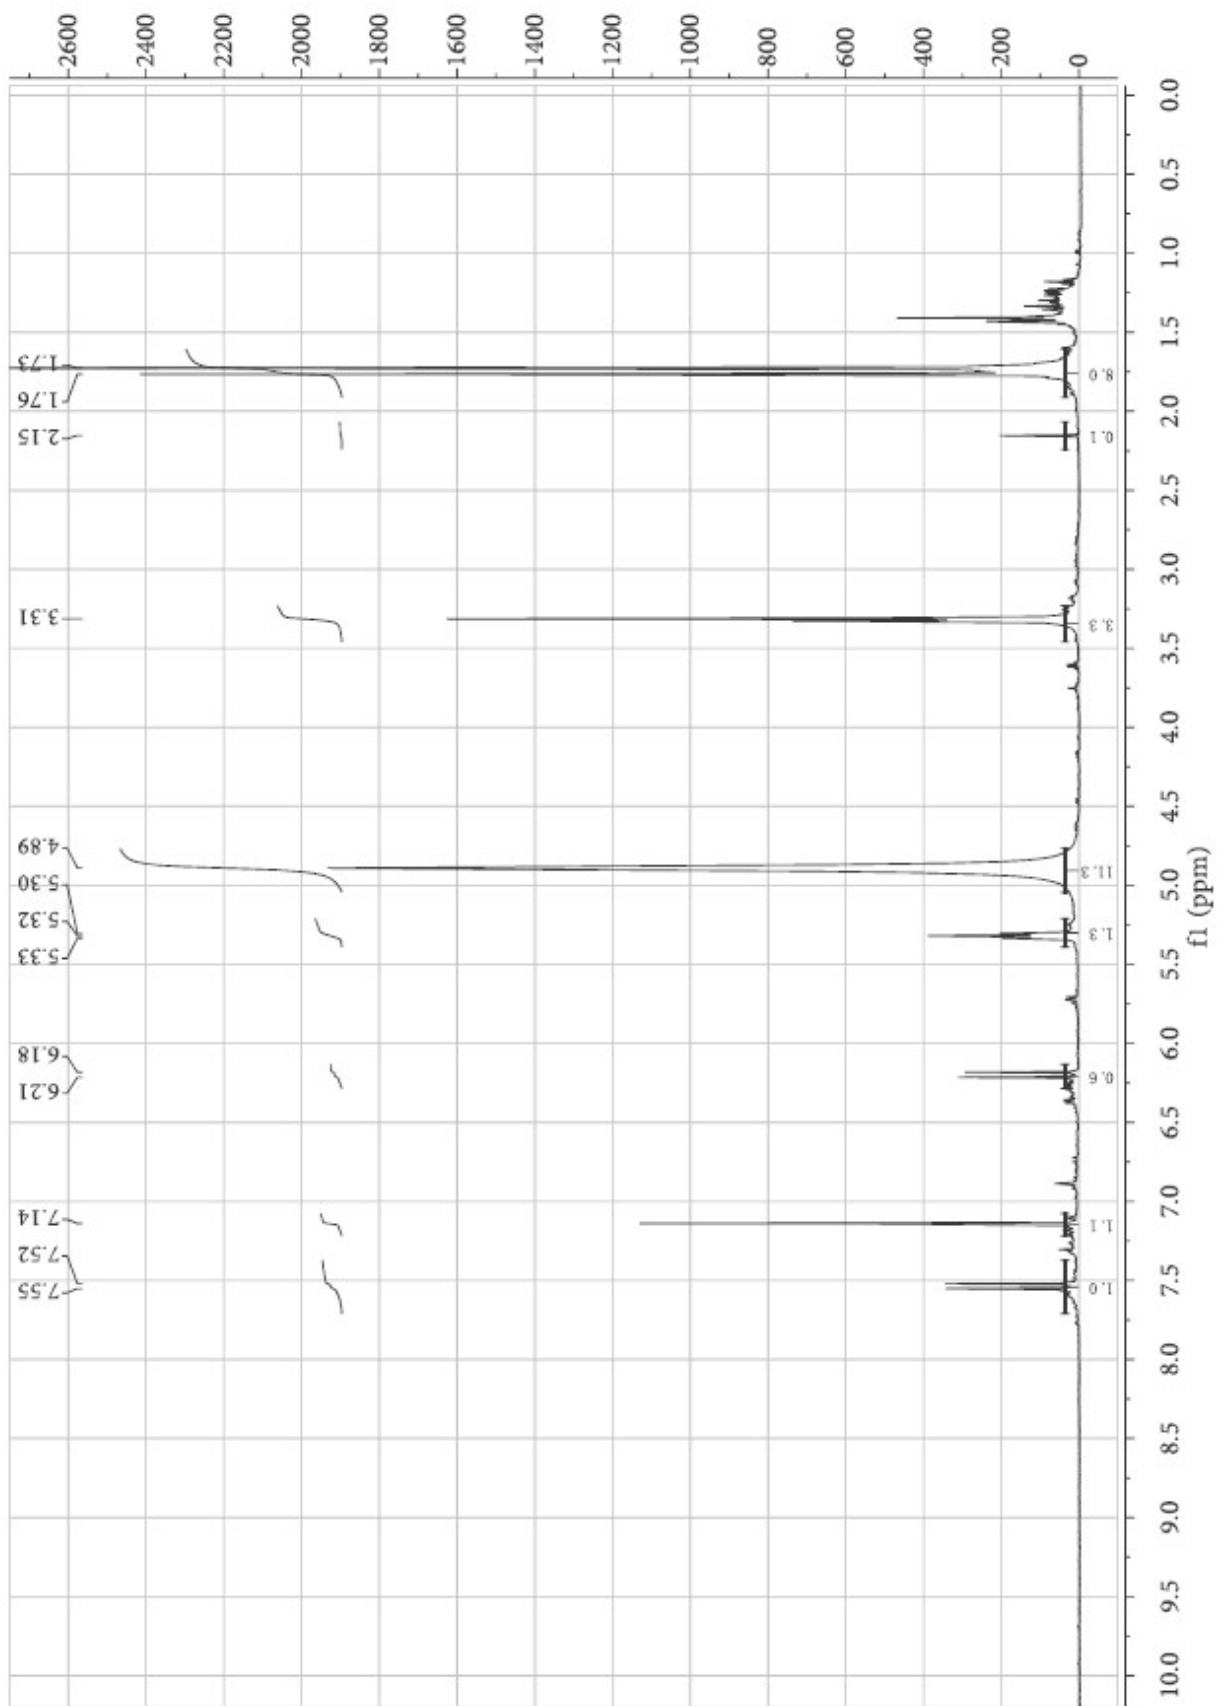

D Figure  
(A) ES

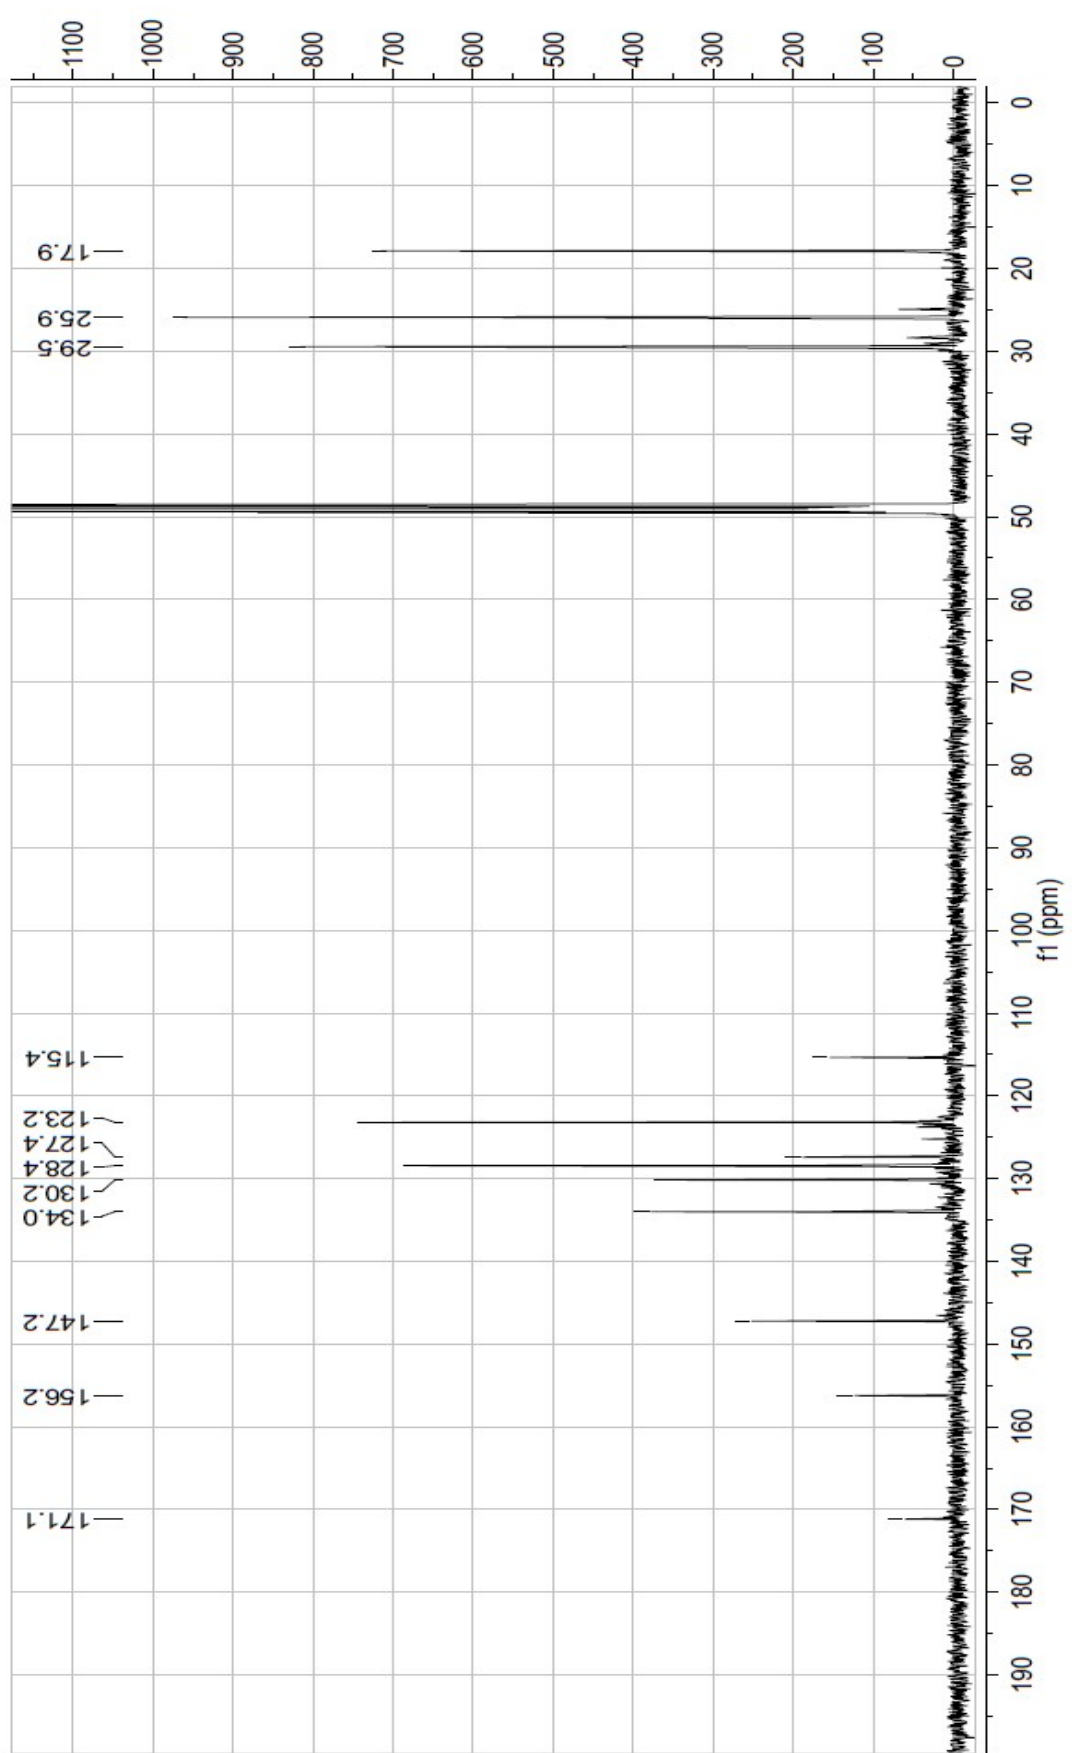

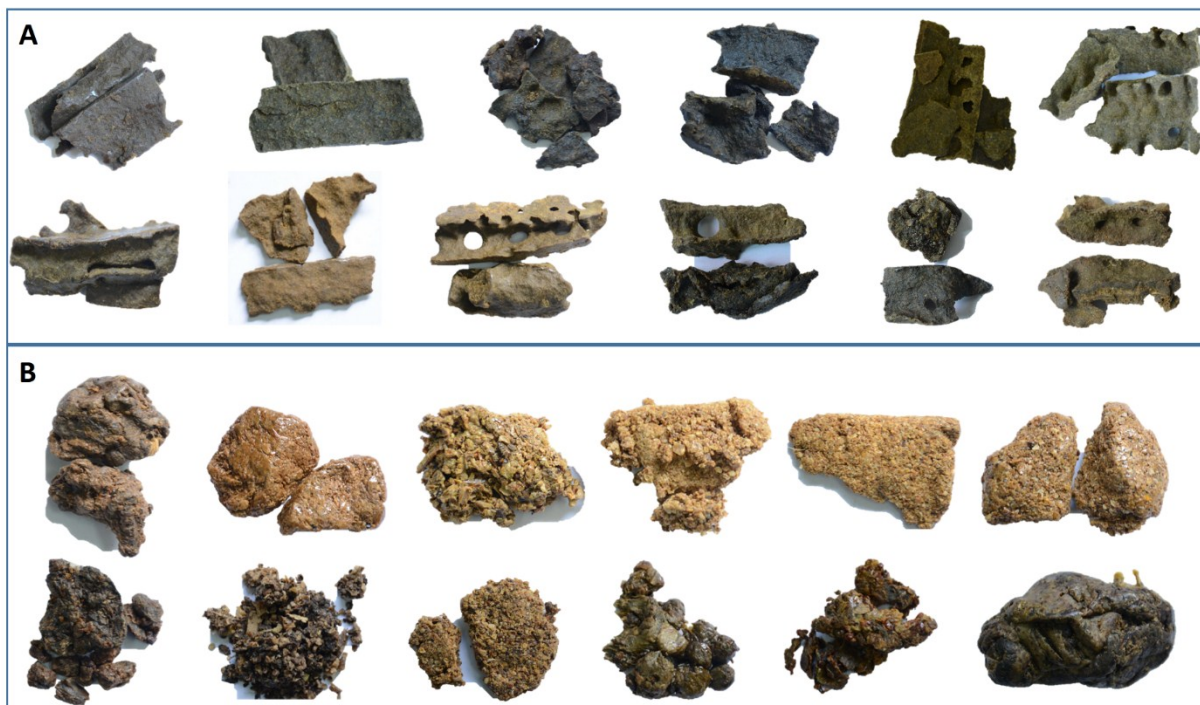

Figure S2. 12 batches of Brazilian green propolis samples (A) and 12 batches of Chinese propolis samples (B) tested in current study.
